# Supplementary material for: Organocatalyzed controlled ROP of β-lactones towards poly(hydroxyalkanoate)s: from β-butyrolactone to benzyl β-malolactone polymers
Source: Royal Society of Chemistry journal article supplement (doi:10.1039/c3py00401e), 2013-01-01
Supplement: c3py00401e.pdf [file c3py00401e.pdf]

## Supporting Information

**Organocatalyzed Controlled ROP of  $\beta$ -Lactones towards Poly(HydroxyAlkanoate)s:**

**From  $\beta$ -Butyrolactone to Benzyl  $\beta$ -Malolactone Polymers**

Cédric G. Jaffredo, Jean-François Carpentier,<sup>\*</sup> and Sophie M. Guillaume<sup>\*</sup>

Institut des Sciences Chimiques de Rennes, Organometallics, Materials and Catalysis, UMR

6226 CNRS-Université de Rennes 1, Campus de Beaulieu, F-35042 Rennes Cedex, France

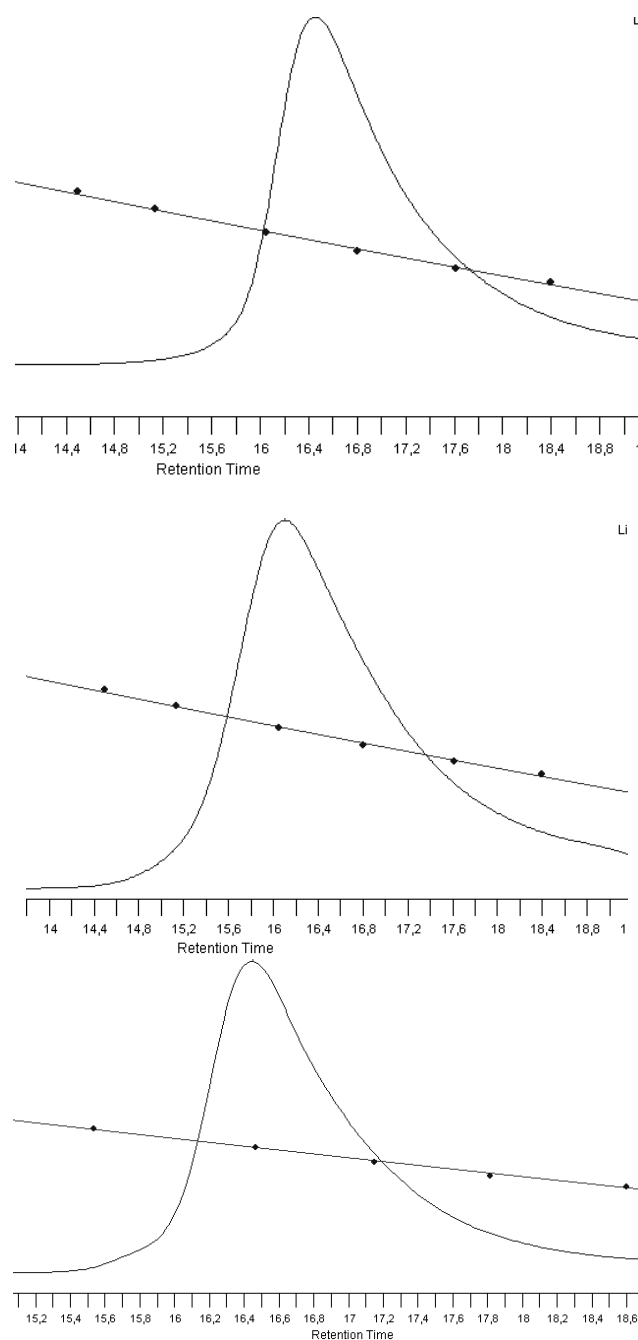

**Figure S1.** SEC traces of PMLABes produced from the ROP of MLABe mediated by organocatalysts: (top) TBD (Table 1, entry 2); (middle) DBU (Table 1, entry 6); (bottom) BEMP (Table 1, entry 9).

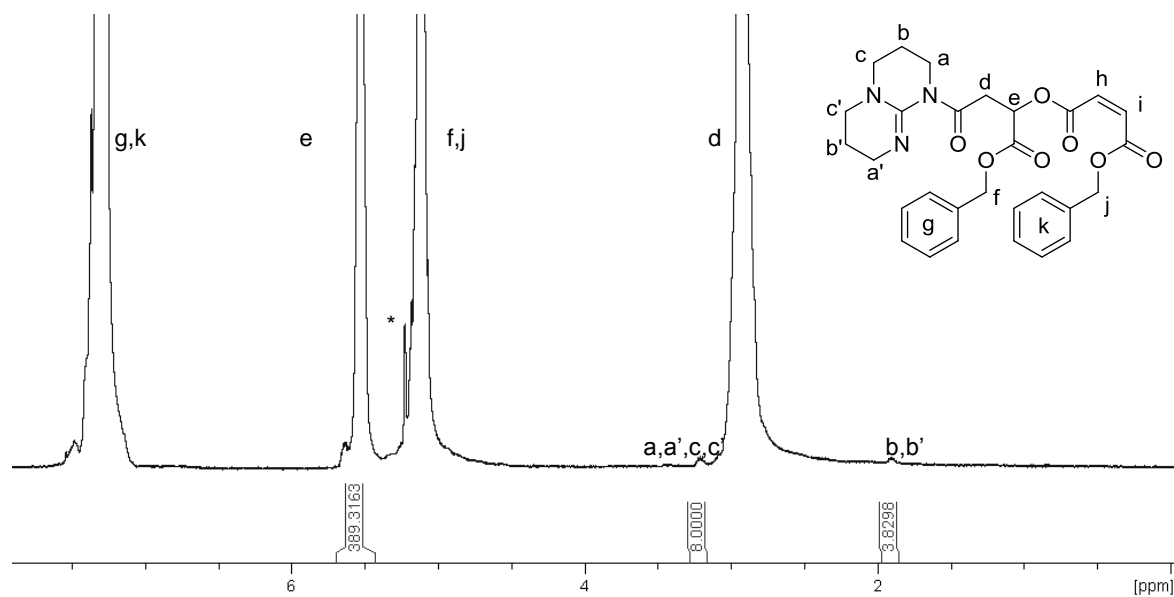

**Figure S2.**  $^1\text{H}$  NMR (400 MHz,  $\text{CDCl}_3$ , 25 °C) spectrum of a high molar mass ( $M_{n,\text{NMR}} = 80\,400\text{ g}\cdot\text{mol}^{-1}$ ), twice-precipitated PMLABe produced in the presence of TBD, illustrating the possibility to reliably evaluate  $M_{n,\text{NMR}}$  even at such high molar mass polymers (Table 1, entry 4) (\* marker stands for residual  $\text{CH}_2\text{Cl}_2$ ).

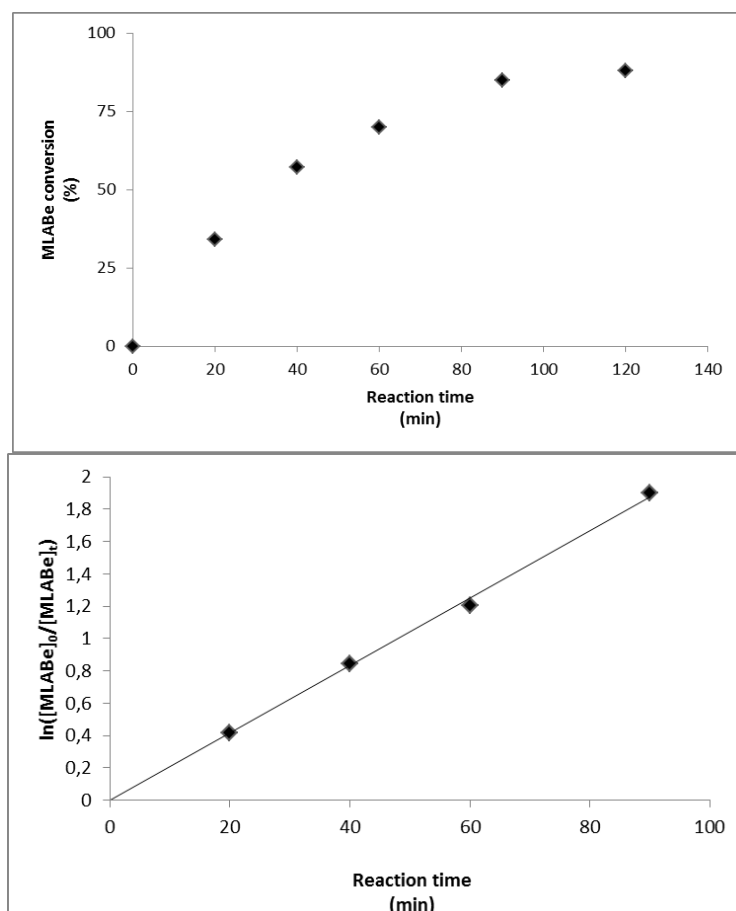

**Figure S3.** Kinetics of the ROP of bulk MLABe promoted by TBD at 60 °C (Table 1, entry 2);  $k_{\text{app}} = 1.252 (\pm 2.10^{-3})\text{ h}^{-1}$ ,  $R^2 = 0.999$ .

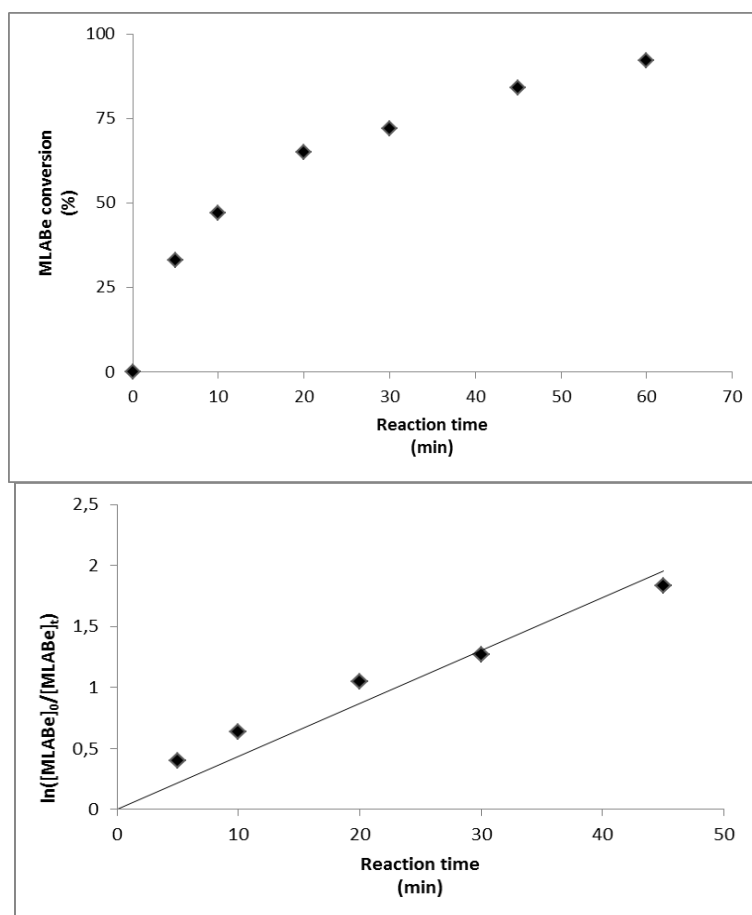

**Figure S4.** Kinetics of the bulk ROP of MLABe promoted by DBU at 60 °C (Table 1, entry 7;  $k_{app} = 2.61(\pm 3.10^{-2}) \text{ h}^{-1}$ ,  $R^2 = 0.943$ ).

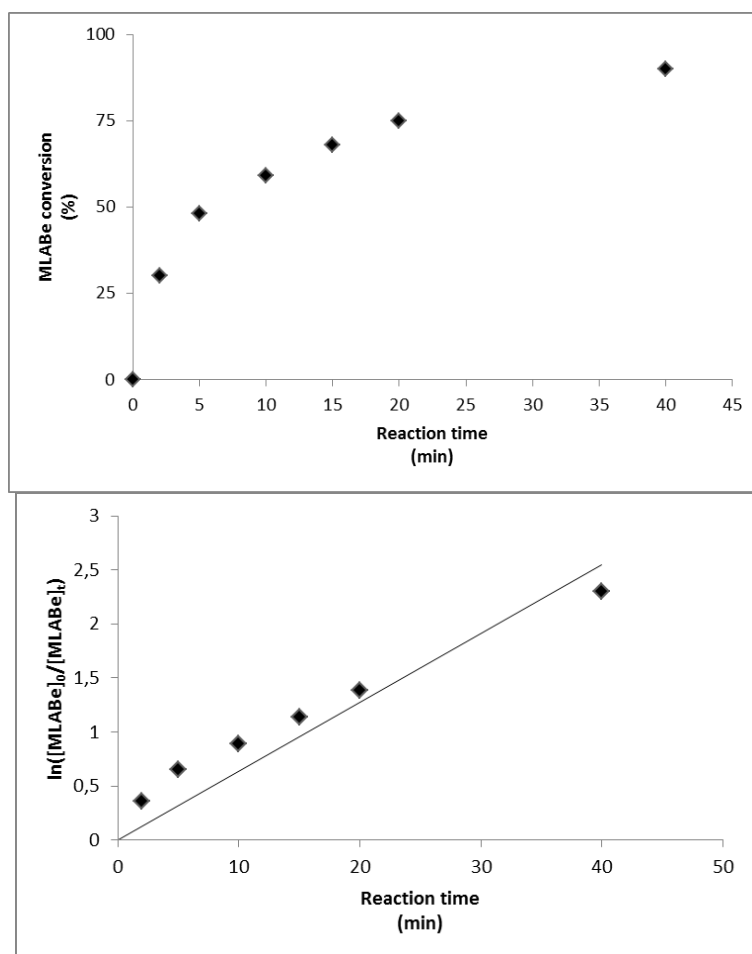

**Figure S5.** Kinetics of the bulk ROP of MLABe promoted by BEMP at 60 °C (Table 1, entry 10);  $k_{app} = 3.8 (\pm 1.10^{-1}) \text{ h}^{-1}$ ,  $R^2 = 0.901$ .

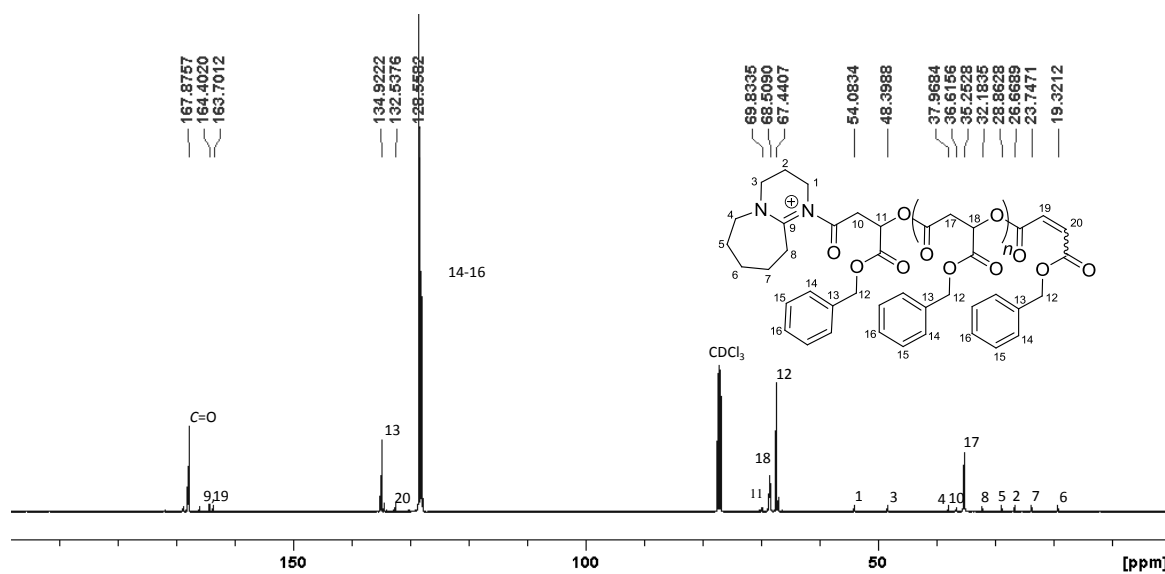

**Figure S6.**  $^{13}\text{C}\{^1\text{H}\}$  NMR (125 MHz;  $\text{CDCl}_3$ , 25 °C) spectrum of a twice-precipitated PMLABe produced in the presence of DBU (Table 1, entry 6).

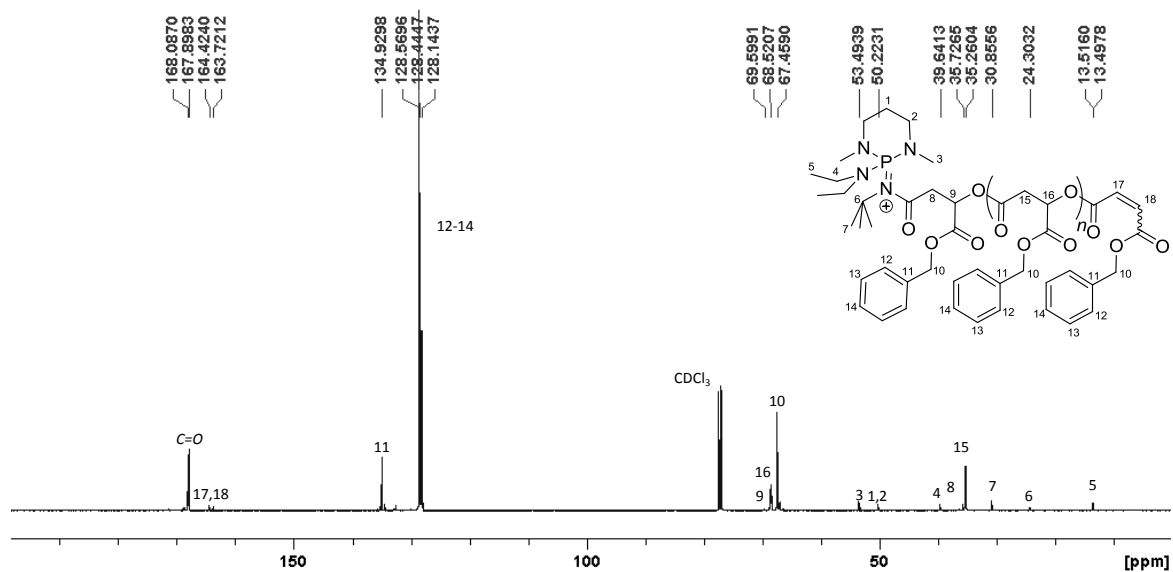

**Figure S7.**  $^{13}\text{C}\{^1\text{H}\}$  NMR (125 MHz;  $\text{CDCl}_3$ , 25 °C) spectrum of a twice-precipitated PMLABe produced in the presence of BEMP (Table 1, entry 9).

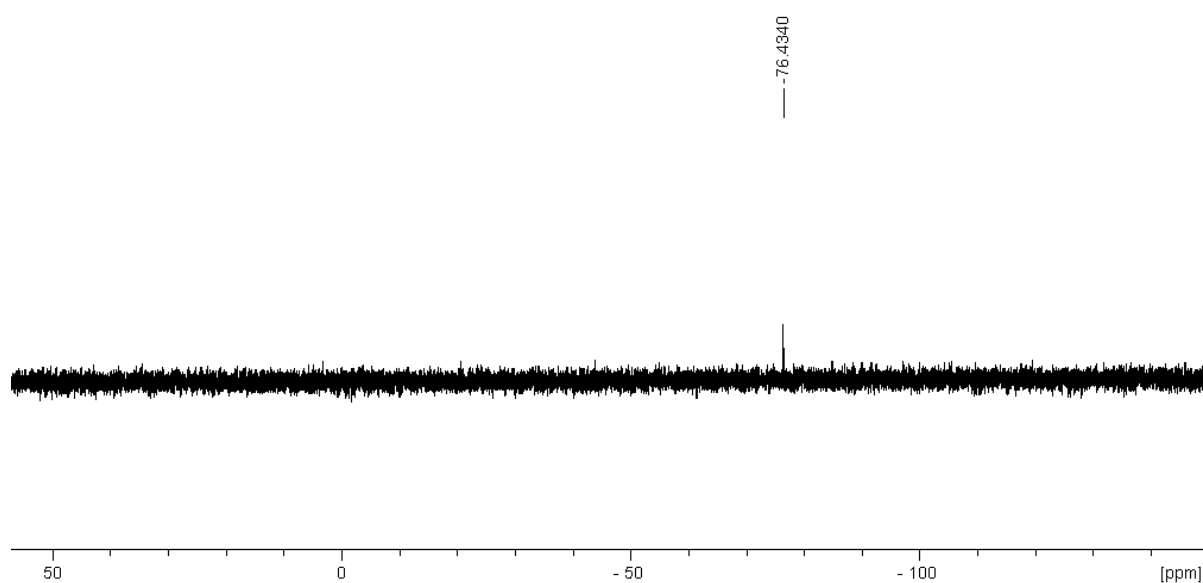

**Figure S8.**  $^{31}\text{P}\{^1\text{H}\}$  NMR (121 MHz,  $\text{CDCl}_3$ , 25 °C) spectrum of a twice-precipitated PMLABe produced in the presence of BEMP (Table 1, entry 10).

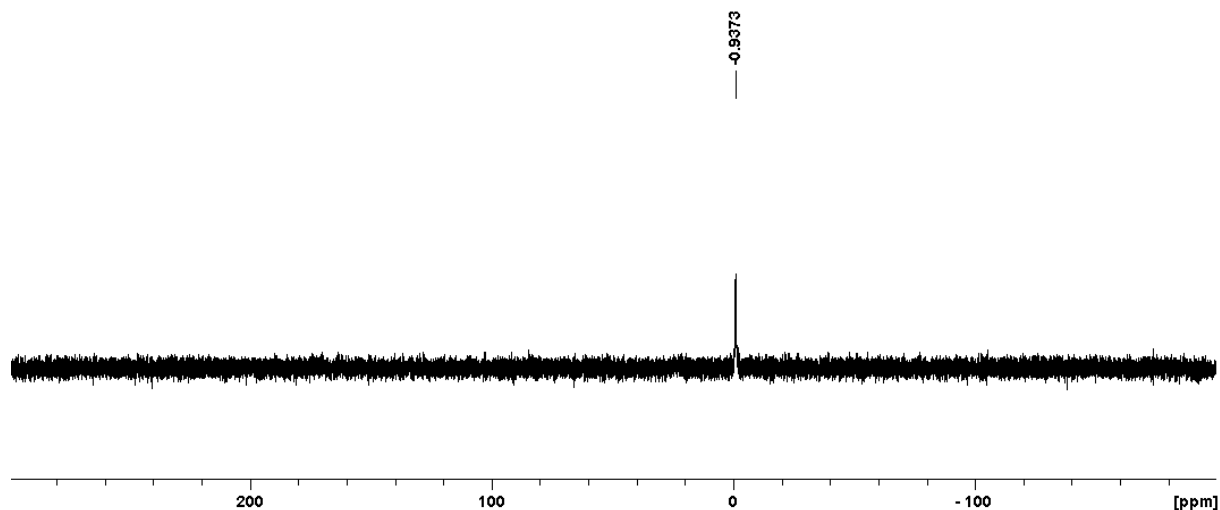

**Figure S9.**  $^{31}\text{P}\{^1\text{H}\}$  NMR (121 MHz,  $\text{CDCl}_3$ , 25 °C) spectrum of BEMP.

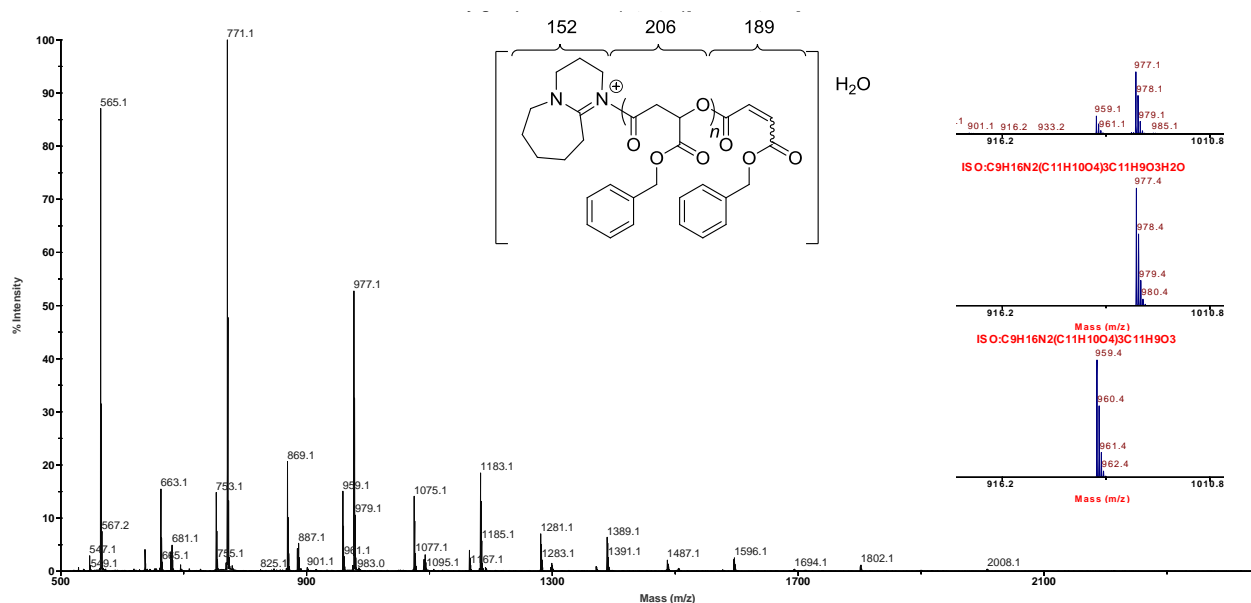

**Figure S10.** MALDI-ToF mass spectrum of a freshly synthesized PMLABe sample produced from DBU, using CHCA as matrix (Table 1, entry 6). The major population corresponds to  $[\text{DBU}\{\text{MLABe}\}_n\text{C}(\text{O})\text{CH}=\text{CH}(\text{CO}_2\text{Be})]^+\cdot\text{H}_2\text{O}$  macromolecules ( $[\text{M}]^+\cdot\text{H}_2\text{O}$ ), with  $m/z = 771.1$   $\text{g}\cdot\text{mol}^{-1}$  for  $n = 3$  (isotopic simulation for  $[\text{DBU}\{\text{MLABe}\}_3\text{C}(\text{O})\text{CH}=\text{CH}(\text{CO}_2\text{Be})]^+\cdot\text{H}_2\text{O}$ ,  $^{12}\text{C}_{42}\text{H}_{47}\text{O}_{12}\text{N}_2$ ,  $m/z = 771.4$   $\text{g}\cdot\text{mol}^{-1}$ ). The minor populations correspond to  $m/z$ :  $[\text{M}]^+ = 753.1$   $\text{g}\cdot\text{mol}^{-1}$  and  $m/z$ :  $[\text{M}]^+\cdot\text{H}_2\text{O} - \text{OCH}_2\text{Ph} (107) - \text{H} = 663.1$   $\text{g}\cdot\text{mol}^{-1}$ .

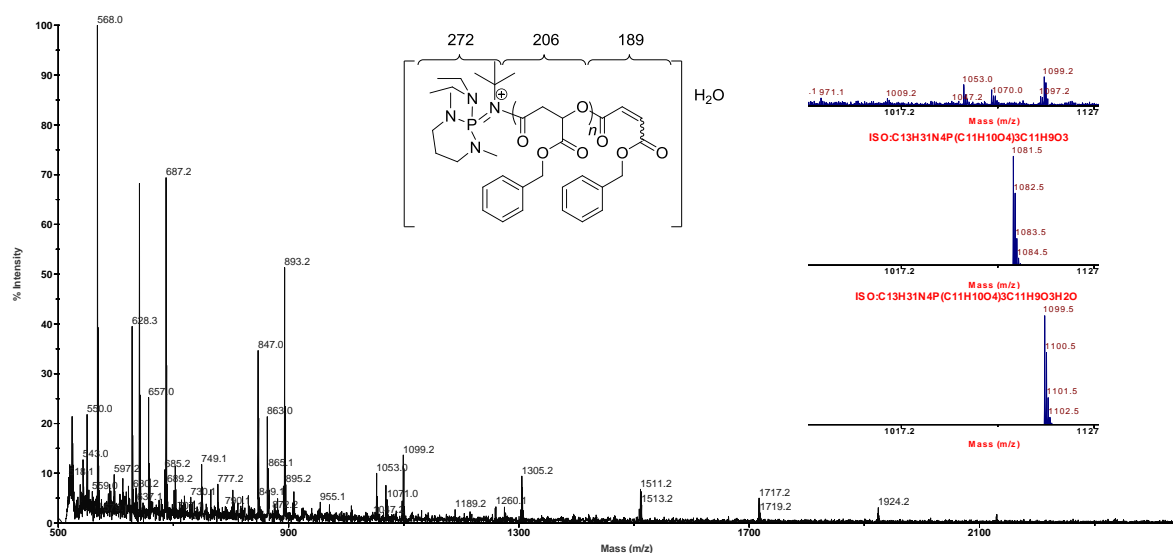

**Figure S11.** MALDI-ToF mass spectrum of a freshly synthesized PMLABe sample produced from BEMP, using CHCA as matrix (Table 1, entry 9). The major population corresponds to  $[\text{BEMP}\{\text{MLABe}\}_n\text{C}(\text{O})\text{CH}=\text{CH}(\text{CO}_2\text{Be})]^+\cdot\text{H}_2\text{O}$  macromolecules ( $[\text{M}]^+\cdot\text{H}_2\text{O}$ ) with  $m/z = 893.2 \text{ g}\cdot\text{mol}^{-1}$  for  $n = 2$  (isotopic simulation for  $[\text{BEMP}\{\text{MLABe}\}_2\text{C}(\text{O})\text{CH}=\text{CH}(\text{CO}_2\text{Be})]^+\cdot\text{H}_2\text{O}$ ,  $^{12}\text{C}_{46}\text{H}_{62}\text{O}_{12}\text{N}_4\text{P}_1$ ,  $m/z = 893.4 \text{ g}\cdot\text{mol}^{-1}$ ). The minor populations correspond to  $[\text{M}]^+ - \text{Et} + \text{H} = 847.0 \text{ g}\cdot\text{mol}^{-1}$  and to  $[\text{M}]^+\cdot\text{H}_2\text{O} - \text{Et} - \text{H} = 863.0 \text{ g}\cdot\text{mol}^{-1}$ .

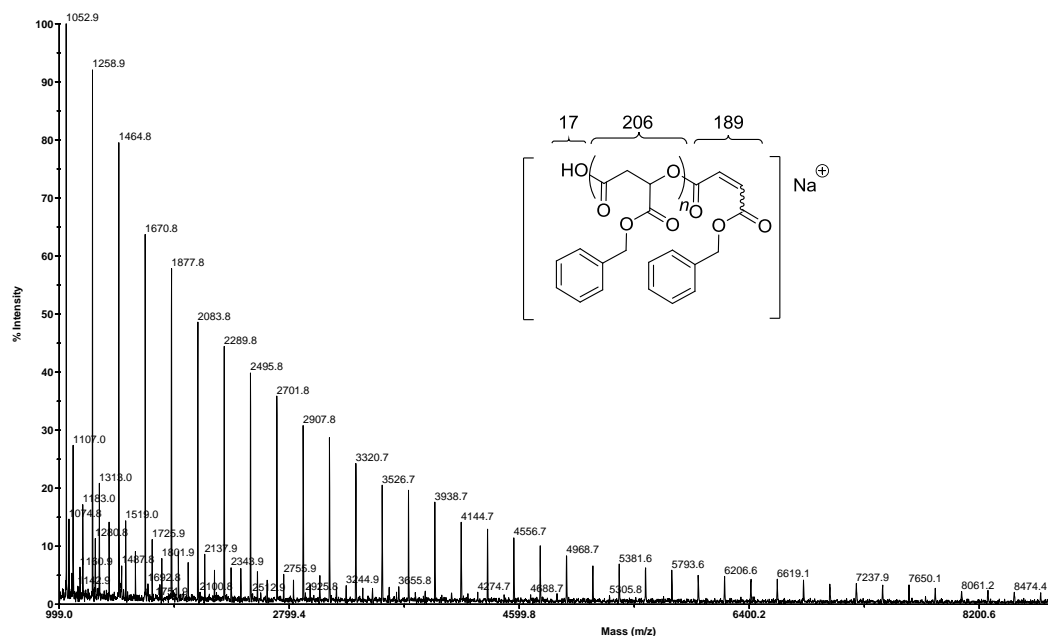

**Figure S12.** MALDI-ToF mass spectrum of a *non-freshly* synthesized PMLABe sample, initially produced from DBU, using IAA as matrix (Table 1, entry 6). The major population corresponds to  $[\text{HO}\{\text{MLABe}\}_n\text{C}(\text{O})\text{CH}=\text{CH}(\text{CO}_2\text{Be})]\text{Na}^+$  macromolecules ( $[\text{M}]^+\cdot\text{Na}$ ), with  $m/z = 1053.2 \text{ g}\cdot\text{mol}^{-1}$  for  $n = 4$  (isotopic simulation for  $[\text{HO}\{\text{MLABe}\}_4\text{C}(\text{O})\text{CH}=\text{CH}(\text{CO}_2\text{Be})]\text{Na}^+$ ,  $^{12}\text{C}_{55}\text{H}_{50}\text{O}_{20}\text{Na}_1$ ,  $m/z = 1053.2 \text{ g}\cdot\text{mol}^{-1}$ ).



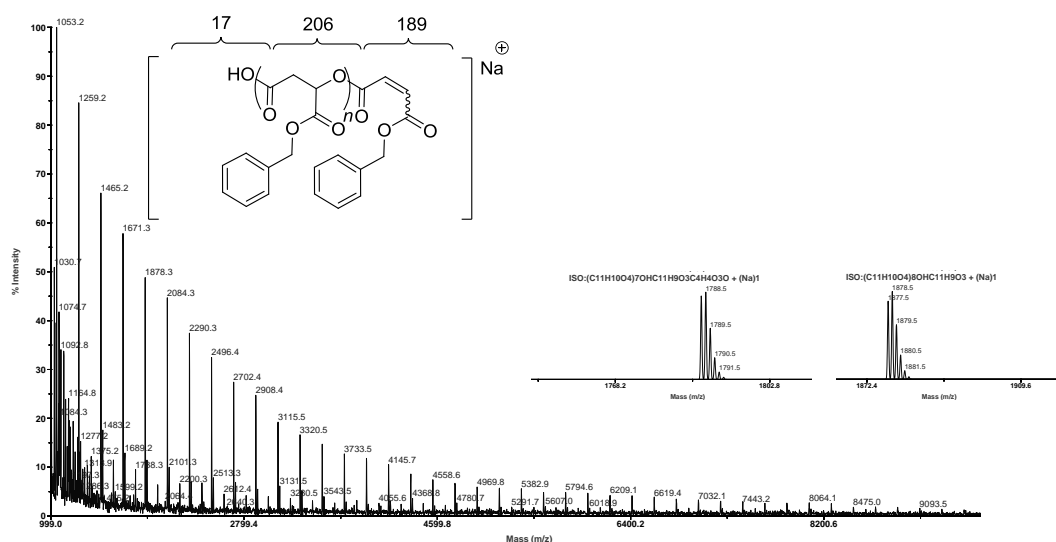

**Figure S13.** MALDI-ToF mass spectrum of a *non-freshly* synthesized PMLABe sample, initially produced from BEMP, using IAA as matrix (Table 1, entry 9). The major population corresponds to  $[\text{HO}\{\text{MLABe}\}_n\text{C}(\text{O})\text{CH}=\text{CH}(\text{CO}_2\text{Be})]\text{Na}^+$  macromolecules ( $[\text{M}]\cdot\text{Na}^+$ ) with  $m/z = 1053.2 \text{ g}\cdot\text{mol}^{-1}$  for  $n = 4$  (isotopic simulation for  $[\text{HO}\{\text{MLABe}\}_4\text{C}(\text{O})\text{CH}=\text{CH}(\text{CO}_2\text{CH}_2\text{Ph})]\text{Na}^+$ ,  $^{12}\text{C}_{55}^{1}\text{H}_{50}^{16}\text{O}_{20}^3\text{Na}_1$ ,  $m/z = 1053.2 \text{ g}\cdot\text{mol}^{-1}$ ). The minor populations correspond to  $[\text{M}]\cdot\text{K}^+$ ,  $m/z + 16 \text{ g}\cdot\text{mol}^{-1}$ ,  $[\text{M}]\cdot\text{Na}^+ - \text{CH}_2\text{Ph}$ ,  $m/z - 91 \text{ g}\cdot\text{mol}^{-1}$  and  $[\text{M}]\cdot\text{K}^+ - \text{CH}_2\text{Ph}$ :  $m/z + 16 - 91 \text{ g}\cdot\text{mol}^{-1}$ .

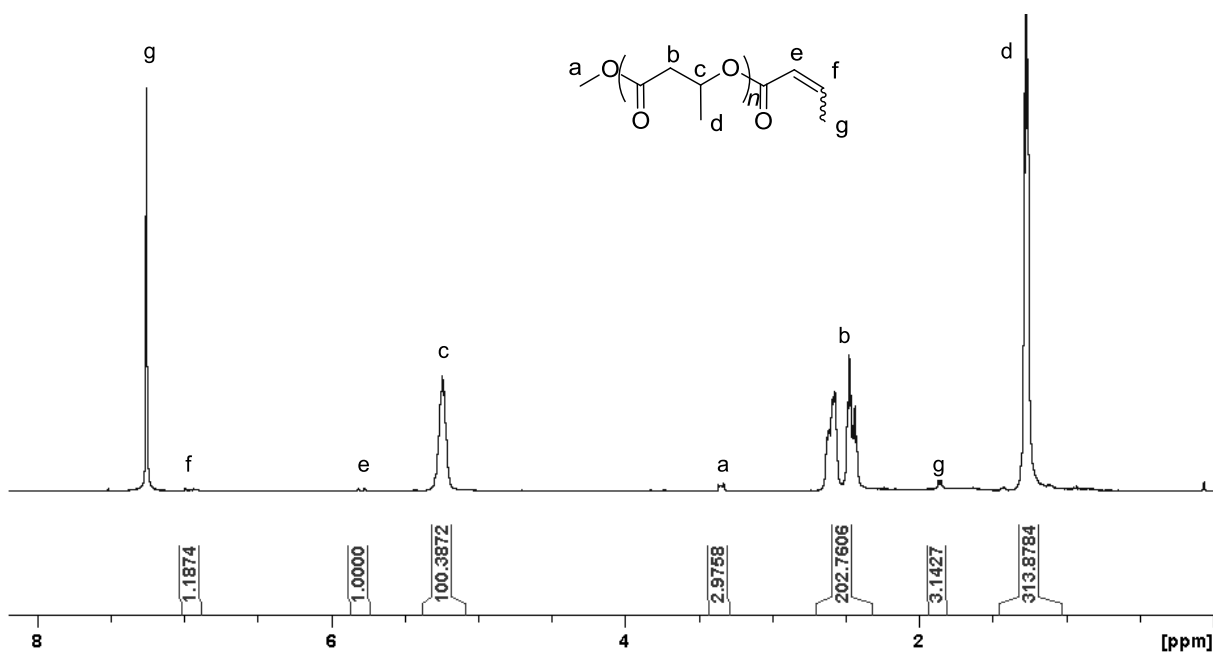

**Figure S14.**  $^1\text{H}$  NMR (400 MHz,  $\text{CDCl}_3$ , 25 °C) spectrum of an  $\alpha$ -TBD- $\omega$ -crotonate PHB sample left in the presence of wet methanol for 1 h at 23 °C ( $M_{n, \text{SEC}} = 7\,200 \text{ g}\cdot\text{mol}^{-1}$ ,  $D_M = 1.25$ ).

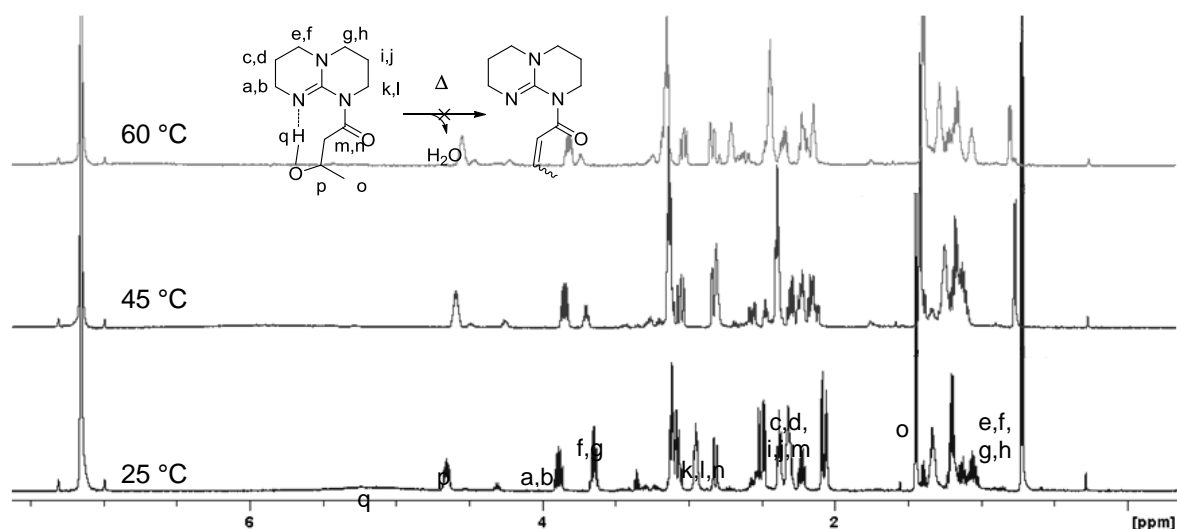

**Figure S15.**  $^1\text{H}$  NMR (500 MHz, toluene- $d_8$ ) spectra of 1:1 TBD:BL ( $0.05 \text{ mol.L}^{-1}$ ) mixture at (bottom) 25 °C, (middle) 45 °C, and (top) 60 °C.

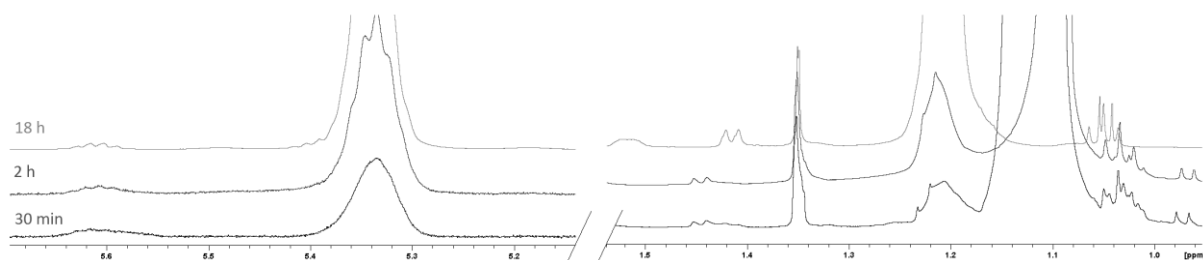

**Figure S16.** Detail of the region of the  $^1\text{H}$  NMR (500 MHz, toluene- $d_8$ , 60 °C) spectra of PHB produced from BEMP, showing the evolution as a function of time of the signals of crotonic ( $\delta = 5.69 \text{ ppm}$ ) and methine ( $\delta = 5.41 \text{ ppm}$ ) hydrogens of PHB, and of the one corresponding to the  $\text{N}(\text{CH}_3)_3$  hydrogens of BEMP ( $\delta = 1.33 \text{ ppm}$ ).

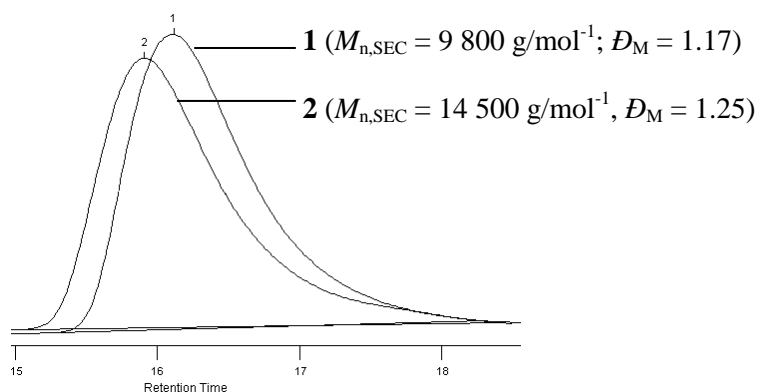

**Figure S17.** SEC traces of PHB produced from the ROP of BL mediated by TBD: (right) first loading of BL (113 equiv.;  $M_{n,\text{SEC}} = 9\,800 \text{ g.mol}^{-1}$ ;  $D_M = 1.17$ ), (left) second loading of BL (168 equiv.;  $M_{n,\text{SEC}} = 14\,500 \text{ g.mol}^{-1}$ ,  $D_M = 1.25$ ).
